# Supplementary material
Source: publisher site journal article supplement (https://www.dovepress.com/article/supplementary_file/603817/603817%20Supplementary%20Material.docx)
Supplement: Supplementary file 1 [file 603817%20Supplementary%20Material.docx]

**Supplementary Table 1 : Reported Cases of Small Bowel Adenocarcinoma Presenting with Gynecologic Metastasis.**

| **Study ID** | **Age** | **Primary SBA Site** | **Gynecologic Presentation** | **Initial Diagnosis** | **Diagnostic Delay**  ” symptom onset → surgical diagnosis” | **Metastatic Sites** | **Final Diagnosis Method** | **Surgical Management** | **Outcome** |
| --- | --- | --- | --- | --- | --- | --- | --- | --- | --- |
| **Tsuruchi et al., 1995**[**(1)**](https://www.zotero.org/google-docs/?xLFcmj) | 49 years | Jejunum (30 cm distal to the ligament of Treitz) | Large unilateral ovarian mass.  Abdominopelvic mass equivalent to 24-week gestation.  Abdominal fullness.  Palpable pelvic mass.  Mildly elevated CA-125 and CA 19-9.  Radiologically suspicious for primary ovarian malignancy. | Presumed primary ovarian mucinous adenocarcinoma. | Approximately 12 months of intermittent gastrointestinal symptoms (nausea and vomiting) prior to correct diagnosis. | Right ovary (isolated ovarian metastasis; no peritoneal or nodal spread). | Intraoperative discovery of jejunal annular lesion.  Histopathological examination.  confirming primary jejunal.  adenocarcinoma with metastatic ovarian involvement.  Correlation of ovarian histology (garland and cribriform pattern, intraluminal necrosis) with gastrointestinal origin. | Total abdominal hysterectomy.  Bilateral salpingo-oophorectomy.  Omentectomy.  Appendectomy.  Pelvic and para-aortic lymphadenectomy.  Partial jejunectomy with end-to-end anastomosis. | Postoperative cerebral hemorrhage (resolved conservatively).  Adjuvant chemotherapy with cisplatin and 5-fluorouracil (3 cycles).  Alive and disease-free at 8-month follow-up. |
| **Dunsmore and Lovell, 1998**[**(2)**](https://www.zotero.org/google-docs/?djwM9K) | 12 years | Jejunum | Bilateral ovarian enlargement with pelvic implants; abnormal uterine bleeding | Metastatic adenocarcinoma with suspected primary ovarian origin | initial pathology favored ovarian primary; final diagnosis revised after extensive histopathologic review | Bilateral ovaries, peritoneum, pelvis, mesenteric lymph nodes, uterus/pelvic wall | Detailed histopathologic review correlating jejunal tumor architecture and invasion pattern with ovarian lesions | Segmental jejunal resection with primary anastomosis; ovarian disease not resected en bloc (debulking limited) | Partial response to chemotherapy (5-FU, leucovorin, α-interferon); progressive disease despite second-line agents; overall survival 23 months. |
| **Kilic and Abadi, 2000**[**(3)**](https://www.zotero.org/google-docs/?tAkwzw) | 53 years | Jejunum | Large unilateral ovarian mass causing bowel obstruction; radiologically and intraoperatively presumed primary ovarian carcinoma | Primary ovarian carcinoma | primary jejunal origin recognized only intraoperatively and confirmed postoperatively with immunohistochemistry. | Right ovary  Pelvis (parametria, Douglas’ pouch)  Peritoneal involvement (serosanguineous ascites) | Histopathology with immunohistochemistry  (CK20 positive, CK7 negative confirming intestinal primary) | Emergency laparotomy  Partial jejunectomy  Right oophorectomy | Early postoperative mortality due to pulmonary embolism (death 6 days postoperatively) |
| **Andresen et al.,2001**[**(4)**](https://www.zotero.org/google-docs/?j3u14p) | 65 years | Ileum (ileocolic junction) | Right adnexal mass detected on vaginal examination.  Ascites.  Elevated CA-125 (181 kU/L).  Rectal impression from pelvic mass. | Presumed primary ovarian cancer. | Severe gastrointestinal symptoms (nausea, diarrhea, profound weight loss, anemia) present for weeks to months.  Small bowel primary not suspected preoperatively.  Diagnosis only established at laparotomy. | Right ovary.  Diffuse peritoneal carcinomatosis.  Pelvic involvement (cecum, sigmoid colon, internal genitalia). | Laparotomy findings.  Histopathology confirming low-grade differentiated adenocarcinoma of ileal origin with ovarian metastasis. | Palliative right hemicolectomy.  Ileostomy.  Radical cytoreductive surgery is not feasible due to extensive disease. | Rapid postoperative progression with massive ascites.  Death 6 weeks after surgery. |
| **Husain et al., 2006**[**(5)**](https://www.zotero.org/google-docs/?3hDKpG) | 45 years | Jejunum (annular constricting lesion) | Left adnexal mass initially; later contralateral adnexal mass with small-bowel obstruction | Presumed primary ovarian adenocarcinoma (endometrioid type on pathology) | One full year between first adnexal mass and recognition of GI primary  Initial pathology misinterpreted → ovarian primary | Bilateral ovaries  Omentum  Mesenteric lymph nodes  Small bowel wall (primary site) | Immunohistochemistry:  CK20+, CEA+  CK7–, CA125–  Confirmed intestinal origin and reclassified the first ovarian mass as metastatic SBA. | Second surgery:  Jejunal segment resection + mesentery  Right adnexal mass removal  Omental nodule excision  Primary anastomosis | Referred for oncologic treatment; prognosis not detailed. |
| **Maekawa et al., 2010**[**(6)**](https://www.zotero.org/google-docs/?kio4D7) | 50 years | Jejunum (70 cm distal to the ligament of Treitz) | Abdominal distension and fullness.  Bilateral ovarian masses (large right ovary, smaller left).  Imaging suggestive of ovarian tumors.  Mildly elevated CEA and CA19-9.  CA-125 within normal range. | Presumed primary ovarian tumor (metastatic suspected but primary site unknown). | Primary jejunal lesion not detected on initial GI workup (upper endoscopy, colonoscopy).  Primary identified only after bilateral salpingo-oophorectomy, guided by pathology suggesting GI origin.  Required FDG-PET and double-balloon enteroscopy for localization. | Bilateral ovaries.  No lymph nodes or peritoneal metastases identified. | Histopathology of ovarian tumors suggesting GI origin.  FDG-PET showing focal jejunal uptake.  Double-balloon enteroscopy with biopsy.  Surgical pathology of jejunal resection. | First surgery: total abdominal hysterectomy, bilateral salpingo-oophorectomy, omentectomy, pelvic lymphadenectomy.  Second surgery: partial jejunal resection with mesenteric lymph node biopsy. | Adjuvant chemotherapy with S-1 for 12 months.  Disease-free at 24 months follow-up. |
| **Huang et al., 2013**[**(7)**](https://www.zotero.org/google-docs/?XPPdAw) | 50 years | Proximal jejunum | Right ovarian mass; pelvic mass suspicious for ovarian malignancy | Suspected primary ovarian cancer / indeterminate pelvic malignancy | ~3–5 months (initial symptoms → definitive diagnosis after bowel obstruction) | Ovary, omentum, vaginal vault, liver, peritoneum | Laparoscopy and later laparotomy with histopathology and immunohistochemistry (CK7+, CK20+, CDX2+, WT1−, ER−) | Diagnostic laparoscopy with ovarian biopsy; later palliative proximal jejunal resection with enteroenterostomy | Palliative chemotherapy poorly tolerated; progressive metastatic disease; death at 12 months |
| **Mitsushita et al. , 2017**[**(8)**](https://www.zotero.org/google-docs/?kwnlZ7) | 34 years | Proximal jejunum (140 cm distal to the ligament of Treitz) | Large ovarian mass initially involving the right ovary, later contralateral ovarian involvement | Presumed primary ovarian mucinous tumor | Initial surgery addressed presumed ovarian primary; SBA identified only after disease progression and second laparotomy | Right ovary (initial)  Left ovary (metachronous)  Peritoneal dissemination (at second surgery)  (No lymph node metastasis) | Surgical pathology of jejunal lesion and ovarian tumors  Histopathologic concordance  Immunohistochemistry (p53+, EGFR+, ER−, HER2−) | First surgery: Right salpingo-oophorectomy  Second surgery: Total hysterectomy, left salpingo-oophorectomy, jejunal resection, pelvic and para-aortic lymphadenectomy | Alive with disease; recurrence after adjuvant chemotherapy, ongoing systemic therapy at last follow-up. |
| **An-Chieh Liu et al., 2018**[**(9)**](https://www.zotero.org/google-docs/?vDUcDo) | 53 years | Jejunum (≈20 cm distal to Treitz ligament) | Bilateral ovarian masses (Krukenberg tumors); abdominal distension | Suspected primary ovarian malignancy / bilateral adnexal tumors | ~3 months (symptom onset → definitive diagnosis) | Bilateral ovaries, para-aortic lymph nodes | Exploratory laparotomy + histopathology + immunohistochemistry (CK20+, CDX2+, CK7−, PAX8−) | Bilateral salpingo-oophorectomy, total hysterectomy, omentectomy, pelvic lymph node sampling, segmental jejunal resection. | Recovered postoperatively; stage IV disease (pT4N0M1); referred for palliative chemotherapy |
| **Iwata et al., 2020**[**(10)**](https://www.zotero.org/google-docs/?ZAoeBo) | 59 years | Ileum (20 cm proximal to the ileocecal valve) | Right ovarian mass detected on CT and MRI.  Pelvic mass suspicious for primary or secondary ovarian malignancy.  Elevated CEA.  Tumor identified during gynecologic surgery (TAH + BSO). | Suspected primary or secondary ovarian malignancy | Not explicitly prolonged; ileal primary not detected on preoperative GI evaluation and identified only during ovarian tumor surgery. | Right ovary (isolated ovarian metastasis) | Intraoperative detection of ileal tumor during ovarian surgery.  Histopathology confirming primary ileal mucinous adenocarcinoma with ovarian metastasis.  Immunohistochemistry showing MSH2/MSH6 loss.  Genetic testing confirming germline EPCAM exon 8–9 deletion (Lynch syndrome). | Total abdominal hysterectomy.  Bilateral salpingo-oophorectomy.  Partial omentectomy.  Partial ileal resection. | Adjuvant chemotherapy with CAPOX (capecitabine + oxaliplatin), followed by capecitabine monotherapy.  Disease-free at 24-month follow-up. |
| **Yang et al., 2023**[**(11)**](https://www.zotero.org/google-docs/?LyT42k) | 57 years | Mid-ileum | Large right adnexal mass (33 × 28 × 15 cm)  Bloating, increased abdominal girth  Abnormal uterine bleeding  Elevated CA-125 (616)  Imaging favored ovarian origin | Primary ovarian mucinous adenocarcinoma | Small bowel primary missed at initial presentation  Delay until recurrent small bowel obstruction and perforation  Diagnosis established only after emergency laparotomy and bowel resection | Ovary (right)  Mesentery (tumor deposit)  Visceral peritoneum (serosal involvement) | Histopathology of resected small bowel lesion  Identification of adenomatous component  Identical morphology and immunophenotype between ovarian and bowel tumors  Molecular confirmation: shared BRAF K601E mutation  Multidisciplinary tumor board consensus | Total hysterectomy + bilateral salpingo-oophorectomy (initial)  Emergency laparotomy with small bowel resection for perforation  Appendectomy (diagnostic, negative) | Postoperative complications: anastomotic leak, tertiary peritonitis  Required ICU admission and broad-spectrum antimicrobial therapy  Final staging: primary small bowel adenocarcinoma pT4 pN0  Long-term oncologic outcome not clearly stated |
| **Nagao et al., 2024**[**(12)**](https://www.zotero.org/google-docs/?choDXG) | Woman in her 50s (postmenopausal) | Small intestine (likely ileum) | Metachronous ovarian metastasis followed by uterine metastasis | Primary small bowel adenocarcinoma (Stage IIIB) | No delay for primary SBA; uterine metastasis diagnosed ~24 months after initial surgery | Ovary (left), uterus, obturator lymph nodes | Histopathology and immunohistochemistry (CK7−, CK20+, SATB2+, ER−, PAX2−) | Initial partial small bowel resection with lymphadenectomy; later bilateral adnexectomy; subsequent total abdominal hysterectomy with pelvic lymph node biopsy. | Alive; receiving systemic chemotherapy (FOLFIRI + bevacizumab) |
| **Takahashi et al., 2024**[**(13)**](https://www.zotero.org/google-docs/?QkKkG1) | 32 years | Jejunum (≈20 cm distal to ligament of Treitz) | Large right ovarian mass during pregnancy (17 cm multilocular cystic mass) | Primary ovarian mucinous carcinoma | primary small bowel origin identified only at cesarean delivery (≈7–8 weeks delay from initial surgery) | Ovary (right), peritoneum (ileocecal region) | Intraoperative palpation during cesarean delivery + histopathology and immunohistochemistry (CK7+, CK20+, ER−) confirming jejunal adenocarcinoma | Initial: Right adnexectomy at 30+6 weeks gestation  Definitive: Cesarean delivery + hysterectomy + left adnexectomy + omentectomy + appendectomy + segmental jejunal resection | Adjuvant chemotherapy (FOLFOX → LV5FU2 → irinotecan); peritoneal recurrence at 11 months; died of disease at 18 months postpartum. |
| **Zhu et al., 2024**[**(14)**](https://www.zotero.org/google-docs/?3xAasV) | 55 years | Small intestine (exact segment not specified; intraoperative mass consistent with jejunal/ileal region) | Bilateral ovarian masses (Krukenberg tumors) presenting with vaginal bleeding and lower abdominal pain | Presumed primary ovarian tumor based on pelvic ultrasound and contrast-enhanced CT | Initial workup focused on gynecologic origin; SBA diagnosed only after colonofiberscopy and histopathology | Bilateral ovaries  Regional lymph nodes (small intestinal nodes 3/12; pericolonic nodes 0/7)  (No liver or peritoneal metastases reported) | Colonofiberscopy with biopsy  Intraoperative and postoperative histopathology  Immunohistochemistry: CDX2(+), SATB2(+), CK20(+), CK7(−), PAX8(−) | Radical right hemicolectomy  Pelvic mass resection (bilateral ovarian metastasectomy) | Alive; receiving systemic chemotherapy (XELOX regimen) with good postoperative recovery |

**References :**

[1.](https://www.zotero.org/google-docs/?tyQgvr)[Tsuruchi N, Kubota H, Tsukamoto N, Kurano A. Primary jejunal adenocarcinoma masquerading as a primary ovarian malignancy. Gynecol Oncol. 1995 July;58(1):129–32.](https://www.zotero.org/google-docs/?tyQgvr)

[2.](https://www.zotero.org/google-docs/?tyQgvr)[Dunsmore KP, Lovell MA. Small bowel adenocarcinoma metastatic to the ovaries in a 12-year-old girl. J Pediatr Hematol Oncol. 1998;20(5):498–501.](https://www.zotero.org/google-docs/?tyQgvr)

[3.](https://www.zotero.org/google-docs/?tyQgvr)[Kilic G, Abadi M. Jejunal adenocarcinoma presenting as a primary ovarian carcinoma. Gynecol Oncol. 2000 Aug;78(2):255–8.](https://www.zotero.org/google-docs/?tyQgvr)

[4.](https://www.zotero.org/google-docs/?tyQgvr)[Andresen DM, Pedersen FH, Rasmussen KL. Adenocarcinoma of the small intestine mistaken as a primary ovarian cancer. Arch Gynecol Obstet. 2001 Nov;265(4):214–5.](https://www.zotero.org/google-docs/?tyQgvr)

[5.](https://www.zotero.org/google-docs/?tyQgvr)[Husain S, Thompson D, Thomas L, Donaldson B, Sabbagh R. Adnexal mass: an unusual presentation of small-bowel adenocarcinoma. J Natl Med Assoc. 2006 May;98(5):799–802.](https://www.zotero.org/google-docs/?tyQgvr)

[6.](https://www.zotero.org/google-docs/?tyQgvr)[Maekawa H, Sato K, Komatsu Y, Orita H, Sakurada M. Jejunal cancer detected after a resection of bilateral ovarian metastasis: report of a case. Surg Today. 2010 Nov;40(11):1084–7.](https://www.zotero.org/google-docs/?tyQgvr)

[7.](https://www.zotero.org/google-docs/?tyQgvr)[Huang YY, Pratt JJ, Dabner M, Tjhin W. Challenging diagnosis of a jejunal adenocarcinoma with ovarian metastasis: report of an unusual case. BMJ Case Rep. 2013 Apr 10;2013:bcr2013008842.](https://www.zotero.org/google-docs/?tyQgvr)

[8.](https://www.zotero.org/google-docs/?tyQgvr)[Mitsushita J, Netsu S, Suzuki K, Nokubi M, Tanaka A. Metastatic Ovarian Tumors Originating From a Small Bowel Adenocarcinoma - A Case Report and Brief Literature Review. Int J Gynecol Pathol Off J Int Soc Gynecol Pathol. 2017 May;36(3):253–60.](https://www.zotero.org/google-docs/?tyQgvr)

[9.](https://www.zotero.org/google-docs/?tyQgvr)[An-Chieh Liu A, Chen CH, Liu WM, Chang CW. A rare Krukenberg tumor arising from a primary adenocarcinoma of the small intestine. Taiwan J Obstet Gynecol. 2018 Apr;57(2):319–22.](https://www.zotero.org/google-docs/?tyQgvr)

[10.](https://www.zotero.org/google-docs/?tyQgvr)[Iwata N, Shikama A, Takao W, Hosokawa Y, Itagaki H, Tasaka N, et al. Ovarian metastases from ileum cancer in a patient with germline EPCAM gene deletion successfully treated with surgical resection and CAPOX chemotherapy: a case report. BMC Med Genet. 2020 Apr 9;21(1):76.](https://www.zotero.org/google-docs/?tyQgvr)

[11.](https://www.zotero.org/google-docs/?tyQgvr)[Yang H, Yuan R, Alex D, Hughesman C, Liu S, Lee U, et al. Metastatic Small Bowel Adenocarcinoma Mimicking a Primary Ovarian Mucinous Tumour - Clinical, Radiologic, Pathologic and Molecular Correlation. Int J Surg Pathol. 2023 Feb;31(1):110–8.](https://www.zotero.org/google-docs/?tyQgvr)

[12.](https://www.zotero.org/google-docs/?tyQgvr)[Nagao S, Matsuura M, Kurokawa S, Tamate M, Akimoto T, Saito T. A Rare Case of Small Intestinal Cancer With Uterine Metastasis After Surgery for Ovarian Metastasis, Diagnosed Using Immunostaining. Case Rep Oncol Med. 2024;2024:8551816.](https://www.zotero.org/google-docs/?tyQgvr)

[13.](https://www.zotero.org/google-docs/?tyQgvr)[Takahashi Y, Iijima T, Ishidera Y, Imai Y, Mizushima T, Utsunomiya D, et al. Primary Small Bowel Adenocarcinoma with Metastatic Ovarian Tumor in a Pregnant Woman. Case Rep Oncol. 2024;17(1):882–90.](https://www.zotero.org/google-docs/?tyQgvr)

[14.](https://www.zotero.org/google-docs/?tyQgvr)[Zhu L, Liu Y, Chen S, Yang G, Wang C. Extremely rare mucinous adenocarcinoma of the small bowel causing bilateral metastatic Kukenberg tumors of the ovaries: A case report. Medicine (Baltimore). 2024 Nov 1;103(44):e40397.](https://www.zotero.org/google-docs/?tyQgvr)
